# Supplementary material
Source: PubMed Central journal article supplement (PMC7925172)
Supplement: JVI.01453-20-s0001.pdf [file JVI.01453-20-s0001.pdf]

## Commercial

## Exhibition

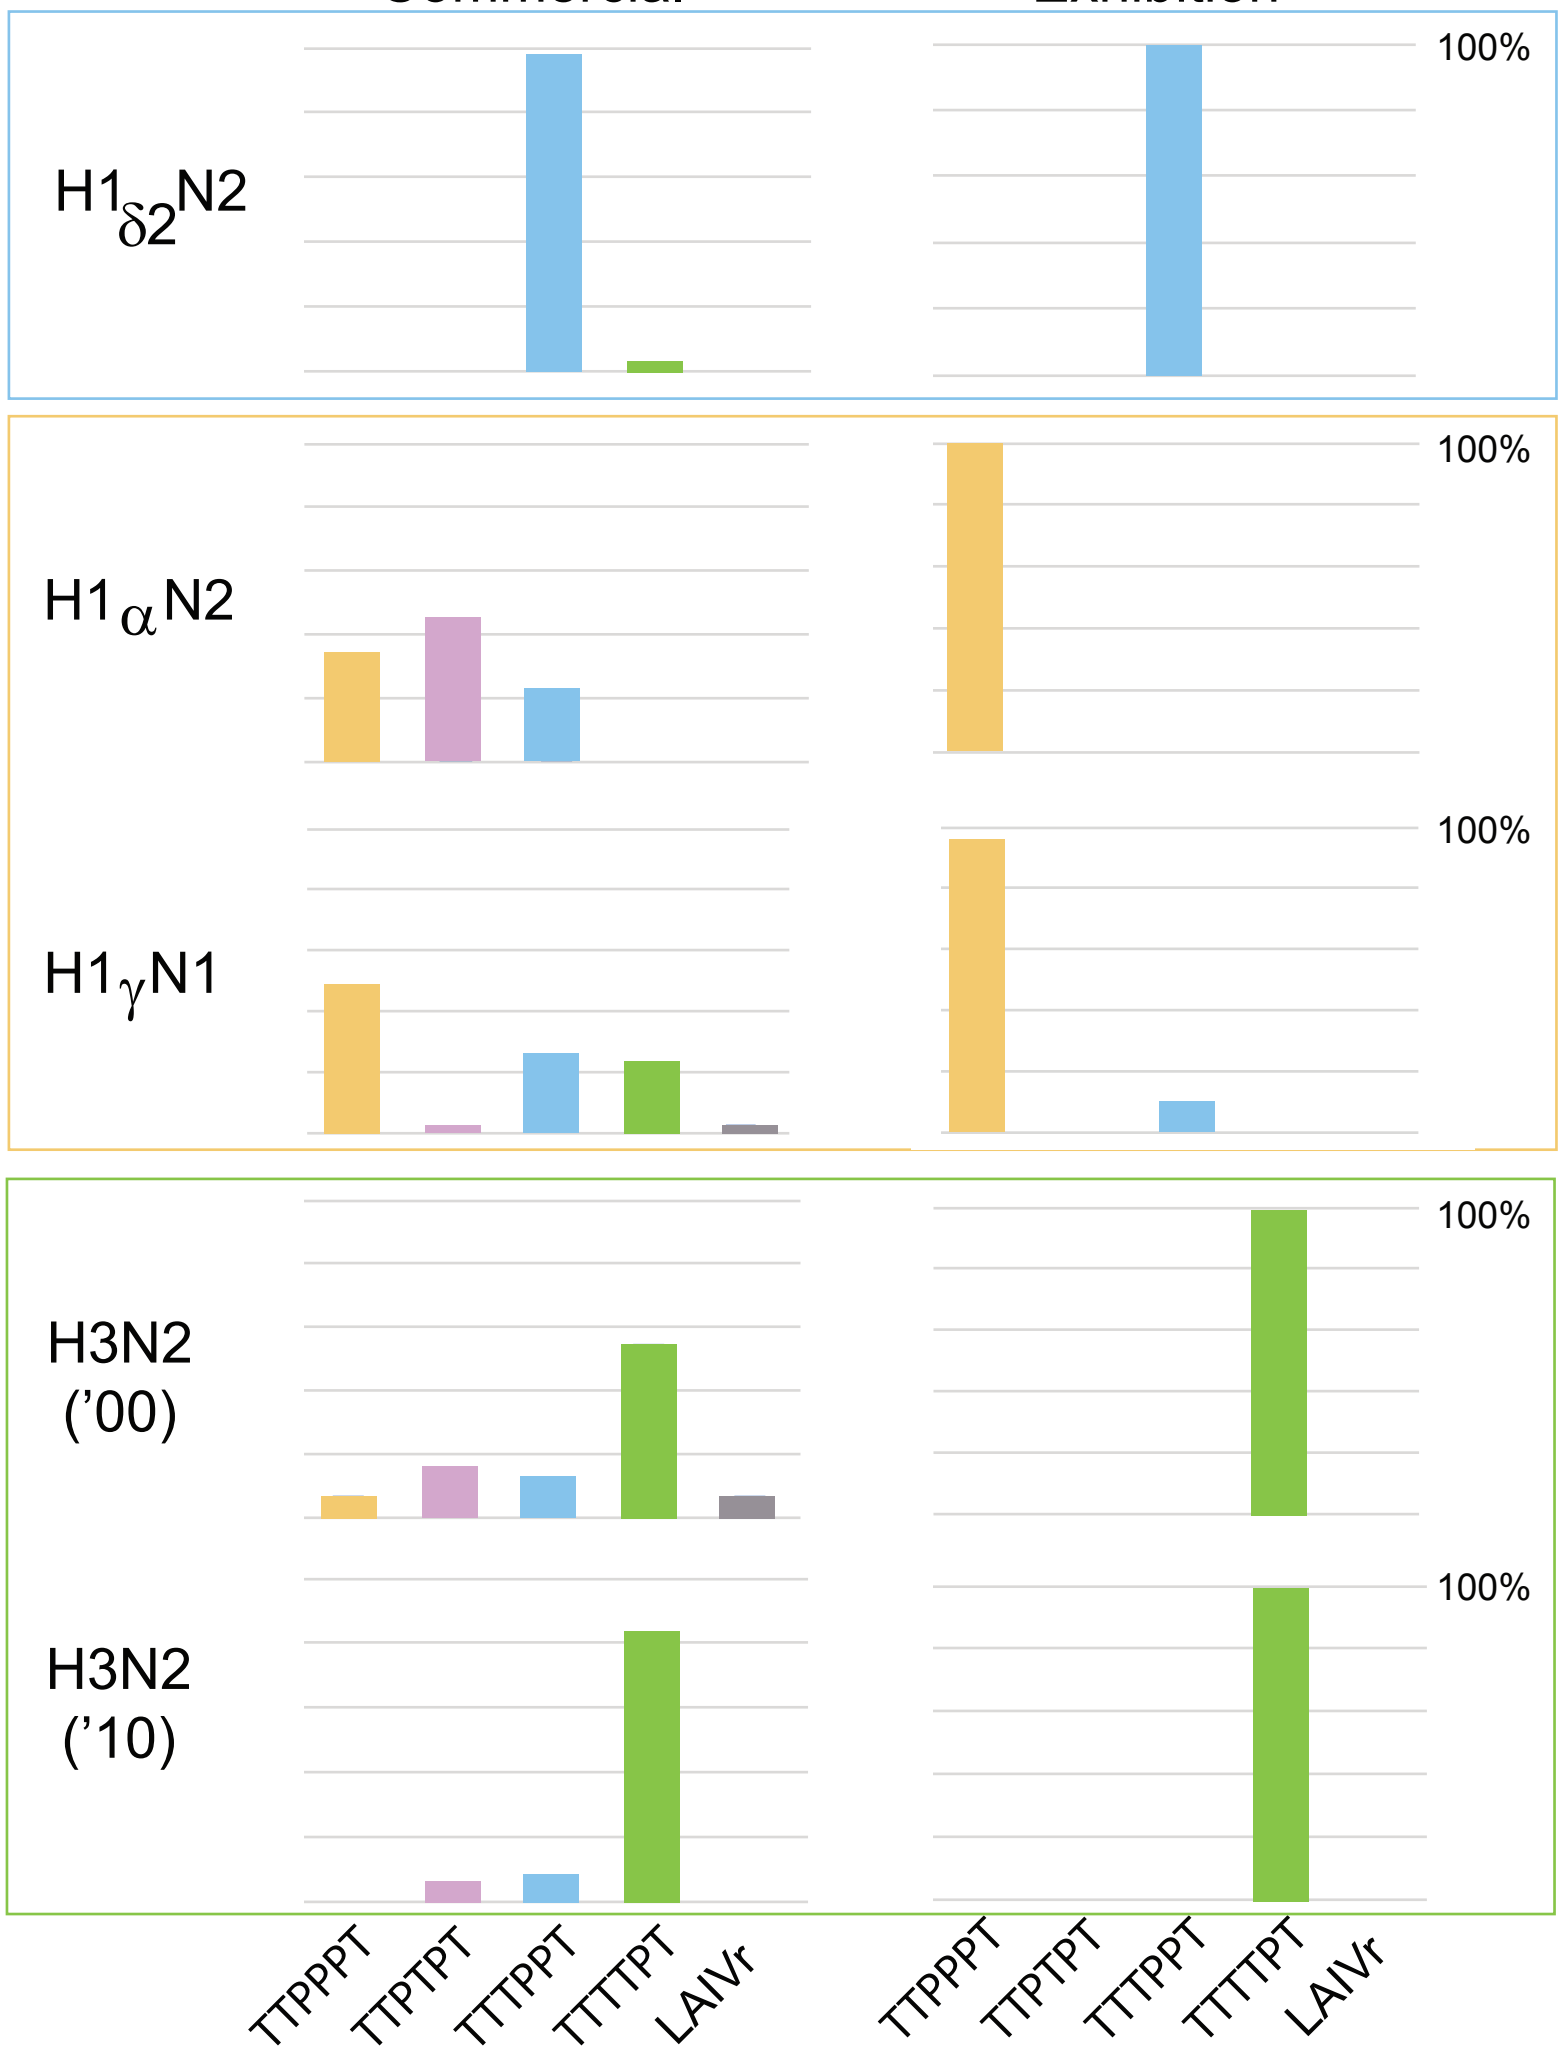

**Figure S2. IAV segment combinations in commercial and exhibition swine.** The y-axis represents the proportion of IAVs with a specific HA-NA combination (left-hand column) that has a specific constellation of internal gene segments (listed on the x-axis), provided for commercial and exhibition swine in the United States during 2018. The six internal gene segments are listed in order of segment length, by convention: PB2, PB1, PA, NP, MP, and NS. The TRIG lineage is indicated with a T; the pandemic lineage is indicated with a P. Internal gene constellations that contain segments that are genetically related to the 1990s strains contained in the live-attenuated influenza vaccine are indicated (LAIVr).

# H1

- Exhibition swine
- Commercial swine
- Human

Reassortment Event (NP)

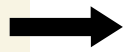

TTTTPT

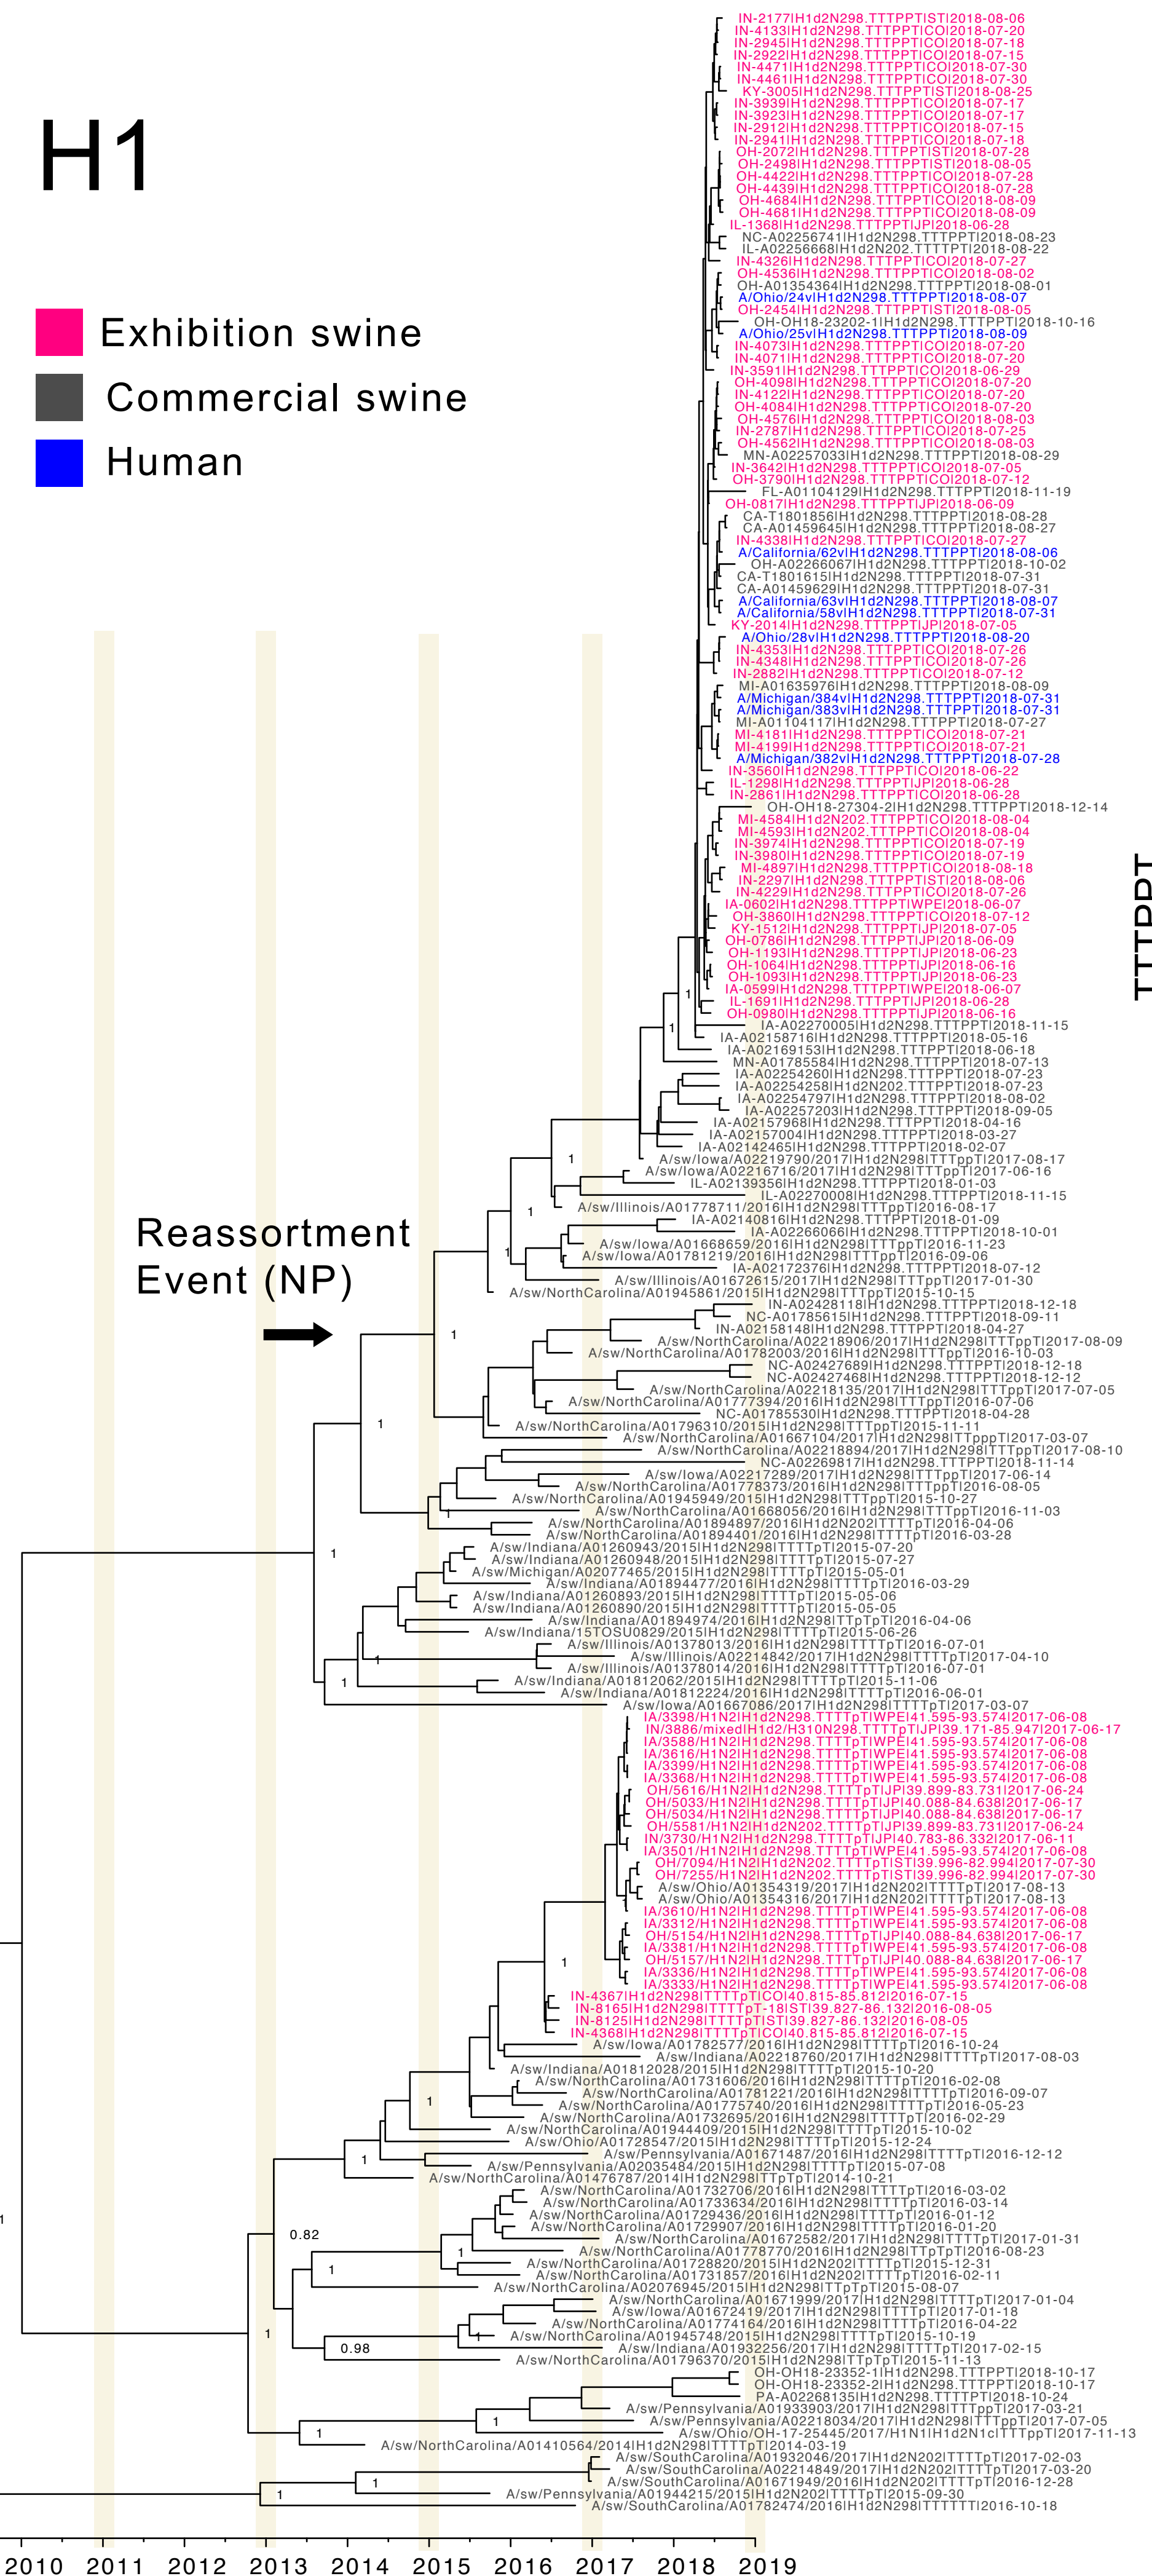

**Figure S3. Phylogenetic relationships of H1δ2 viruses circulating in US swine during 2015-2018.** Maximum likelihood tree inferred for H1δ2 viruses for which whole-genome sequence data were available. Viruses collected from exhibition swine are shaded pink; viruses from commercial swine are shaded grey; viruses from humans are shaded blue. The group of reassortant viruses with a pandemic NP (TTTTPT internal gene constellation) are indicated by a blue line.

**Table S1.** Genbank accession numbers for 212 IAV strains sequenced as a part of this study

| Strain Name                      | 1 PB2    | 2 PB1    | 3 PA     | 4 HA     | 5 NP     | 6 NA     | 7 MP     | 8 NS     |
|----------------------------------|----------|----------|----------|----------|----------|----------|----------|----------|
| A/swine/Illinois/18TOSU1297/2018 | MN198325 | MN198324 | MN198323 | MN198318 | MN198321 | MN198320 | MN198319 | MN198322 |
| A/swine/Illinois/18TOSU1298/2018 | MN198780 | MN198779 | MN198778 | MN198773 | MN198776 | MN198775 | MN198774 | MN198777 |
| A/swine/Illinois/18TOSU1300/2018 | MN198716 | MN198715 | MN198714 | MN198709 | MN198712 | MN198711 | MN198710 | MN198713 |
| A/swine/Illinois/18TOSU1316/2018 | MN198692 | MN198691 | MN198690 | MN198685 | MN198688 | MN198687 | MN198686 | MN198689 |
| A/swine/Illinois/18TOSU1322/2018 | MN198700 | MN198699 | MN198698 | MN198693 | MN198696 | MN198695 | MN198694 | MN198697 |
| A/swine/Illinois/18TOSU1323/2018 | MN198311 | MN198310 | MN198309 | MN198304 | MN198307 | MN198306 | MN198305 | MN198308 |
| A/swine/Illinois/18TOSU1346/2018 | MN198271 | MN198270 | MN198269 | MN198264 | MN198267 | MN198266 | MN198265 | MN198268 |
| A/swine/Illinois/18TOSU1352/2018 | MN198660 | MN198659 |          | MN198654 | MN198657 | MN198656 | MN198655 | MN198658 |
| A/swine/Illinois/18TOSU1356/2018 | MN198317 |          | MN198316 | MN198312 |          | MN198314 | MN198313 | MN198315 |
| A/swine/Illinois/18TOSU1358/2018 | MN198215 | MN198214 | MN198213 | MN198208 | MN198211 | MN198210 | MN198209 | MN198212 |
| A/swine/Illinois/18TOSU1360/2018 | MN198239 | MN198238 | MN198237 | MN198232 | MN198235 | MN198234 | MN198233 | MN198236 |
| A/swine/Illinois/18TOSU1361/2018 | MN198477 | MN198476 | MN198475 | MN198470 | MN198473 | MN198472 | MN198471 | MN198474 |
| A/swine/Illinois/18TOSU1368/2018 | MN198333 | MN198332 | MN198331 | MN198326 | MN198329 | MN198328 | MN198327 | MN198330 |
| A/swine/Illinois/18TOSU1375/2018 | MN198461 | MN198460 | MN198459 | MN198454 | MN198457 | MN198456 | MN198455 | MN198458 |
| A/swine/Illinois/18TOSU1378/2018 | MN198853 | MN198852 | MN198851 | MN198846 | MN198849 | MN198848 | MN198847 | MN198850 |
| A/swine/Illinois/18TOSU1383/2018 | MN198397 | MN198396 | MN198395 | MN198390 | MN198393 | MN198392 | MN198391 | MN198394 |
| A/swine/Illinois/18TOSU1405/2018 | MN198405 | MN198404 | MN198403 | MN198398 | MN198401 | MN198400 | MN198399 | MN198402 |
| A/swine/Illinois/18TOSU1411/2018 | MN198263 | MN198262 | MN198261 | MN198256 | MN198259 | MN198258 | MN198257 | MN198260 |
| A/swine/Illinois/18TOSU1433/2018 | MN198772 | MN198771 | MN198770 | MN198765 | MN198768 | MN198767 | MN198766 | MN198769 |
| A/swine/Illinois/18TOSU1465/2018 | MN198533 | MN198532 | MN198531 | MN198526 | MN198529 | MN198528 | MN198527 | MN198530 |
| A/swine/Illinois/18TOSU1467/2018 | MN198788 | MN198787 | MN198786 | MN198781 | MN198784 | MN198783 | MN198782 | MN198785 |
| A/swine/Illinois/18TOSU1469/2018 | MN198724 | MN198723 | MN198722 | MN198717 | MN198720 | MN198719 | MN198718 | MN198721 |
| A/swine/Illinois/18TOSU1682/2018 | MN198708 | MN198707 | MN198706 | MN198701 | MN198704 | MN198703 | MN198702 | MN198705 |
| A/swine/Illinois/18TOSU1691/2018 | MN198453 | MN198452 | MN198451 | MN198446 | MN198449 | MN198448 | MN198447 | MN198450 |
| A/swine/Illinois/18TOSU1697/2018 | MN198493 | MN198492 | MN198491 | MN198486 | MN198489 | MN198488 | MN198487 | MN198490 |
| A/swine/Illinois/18TOSU1705/2018 | MN198629 | MN198628 | MN198627 | MN198622 | MN198625 | MN198624 | MN198623 | MN198626 |
| A/swine/Illinois/18TOSU1740/2018 | MN198373 | MN198372 | MN198371 | MN198366 | MN198369 | MN198368 | MN198367 | MN198370 |
| A/swine/Illinois/18TOSU1742/2018 | MN198445 | MN198444 | MN198443 | MN198438 | MN198441 | MN198440 | MN198439 | MN198442 |
| A/swine/Illinois/18TOSU1743/2018 | MN198605 | MN198604 | MN198603 | MN198598 | MN198601 | MN198600 | MN198599 | MN198602 |
| A/swine/Illinois/18TOSU1744/2018 | MN198549 | MN198548 | MN198547 | MN198542 | MN198545 | MN198544 | MN198543 | MN198546 |
| A/swine/Illinois/18TOSU1745/2018 | MN198645 | MN198644 | MN198643 | MN198638 | MN198641 | MN198640 | MN198639 | MN198642 |
| A/swine/Illinois/18TOSU1765/2018 | MN198621 | MN198620 | MN198619 | MN198614 | MN198617 | MN198616 | MN198615 | MN198618 |
| A/swine/Illinois/18TOSU1766/2018 | MN198589 | MN198588 | MN198587 | MN198582 | MN198585 | MN198584 | MN198583 | MN198586 |
| A/swine/Indiana/18TOSU2177/2018  | MN198869 | MN198868 | MN198867 | MN198862 | MN198865 | MN198864 | MN198863 | MN198866 |
| A/swine/Indiana/18TOSU2186/2018  | MN198877 | MN198876 | MN198875 | MN198870 | MN198873 | MN198872 | MN198871 | MN198874 |
| A/swine/Indiana/18TOSU2225/2018  | MN198885 | MN198884 | MN198883 | MN198878 | MN198881 | MN198880 | MN198879 | MN198882 |
| A/swine/Indiana/18TOSU2297/2018  | MN198893 | MN198892 | MN198891 | MN198886 | MN198889 | MN198888 | MN198887 | MN198890 |
| A/swine/Indiana/18TOSU2787/2018  | MN687381 | MN687379 | MN687383 | MN687386 | MN687380 | MN687382 | MN687384 | MN687385 |
| A/swine/Indiana/18TOSU2798/2018  | MN686221 |          | MN686220 | MN686222 | MN686225 | MN686223 | MN686224 | MN686219 |
| A/swine/Indiana/18TOSU2860/2018  | MN198901 | MN198900 | MN198899 | MN198894 | MN198897 | MN198896 | MN198895 | MN198898 |
| A/swine/Indiana/18TOSU2861/2018  | MN198909 | MN198908 | MN198907 | MN198902 | MN198905 | MN198904 | MN198903 | MN198906 |

|                                 |          |          |          |          |          |          |          |          |
|---------------------------------|----------|----------|----------|----------|----------|----------|----------|----------|
| A/swine/Indiana/18TOSU2882/2018 | MN686349 | MN686348 | MN686347 | MN686353 | MN686351 | MN686354 | MN686352 | MN686350 |
| A/swine/Indiana/18TOSU2892/2018 | MN687392 |          | MN687388 | MN687387 | MN687390 |          | MN687389 | MN687391 |
| A/swine/Indiana/18TOSU2912/2018 | MN686310 | MN686313 | MN686315 | MN686312 | MN686314 | MN686311 | MN686309 | MN686308 |
| A/swine/Indiana/18TOSU2922/2018 | MN687468 | MN687471 | MN687469 | MN687467 | MN687466 | MN687472 | MN687473 | MN687470 |
| A/swine/Indiana/18TOSU2941/2018 | MN687415 | MN687417 | MN687418 | MN687414 | MN687413 | MN687411 | MN687416 | MN687412 |
| A/swine/Indiana/18TOSU2945/2018 | MN686319 | MN686320 | MN686323 | MN686322 | MN686324 | MN686321 | MN686318 | MN686317 |
| A/swine/Indiana/18TOSU3541/2018 | MN687373 |          | MN687376 | MN687374 | MN687377 |          | MN687375 | MN687378 |
| A/swine/Indiana/18TOSU3560/2018 | MN686459 | MN686462 | MN686458 | MN686457 | MN686463 | MN686460 | MN686464 | MN686461 |
| A/swine/Indiana/18TOSU3591/2018 | MN687331 | MN687332 | MN687330 | MN687327 | MN687334 | MN687333 | MN687329 | MN687328 |
| A/swine/Indiana/18TOSU3605/2018 | MH791951 | MH791963 | MH791948 | MH791962 | MH791952 | MH791953 | MH791944 | MH791954 |
| A/swine/Indiana/18TOSU3611/2018 | MH791949 | MH791950 | MH791960 | MH791959 | MH791942 | MH791961 | MH791945 | MH791947 |
| A/swine/Indiana/18TOSU3614/2018 | MH791964 | MH791943 | MH791957 | MH791956 | MH791946 | MH791965 | MH791955 | MH791958 |
| A/swine/Indiana/18TOSU3642/2018 | MN686238 | MN686241 | MN686242 | MN686239 | MN686240 | MN686243 | MN686245 | MN686244 |
| A/swine/Indiana/18TOSU3656/2018 | MN686435 | MN686431 | MN686432 | MN686433 | MN686430 |          | MN686436 | MN686434 |
| A/swine/Indiana/18TOSU3744/2018 | MN686736 | MN686740 | MN686739 | MN686738 | MN686741 | MN686735 | MN686742 | MN686737 |
| A/swine/Indiana/18TOSU3754/2018 | MN687370 | MN687369 | MN687366 | MN687368 | MN687367 | MN687365 | MN687371 | MN687372 |
| A/swine/Indiana/18TOSU3774/2018 | MN687463 | MN687465 | MN687464 | MN687462 | MN687459 | MN687460 | MN687461 | MN687458 |
| A/swine/Indiana/18TOSU3923/2018 | MN686382 | MN686379 | MN686381 | MN686380 | MN686385 | MN686384 | MN686386 | MN686383 |
| A/swine/Indiana/18TOSU3939/2018 | MN687399 | MN687396 | MN687394 | MN687400 | MN687401 | MN687397 | MN687395 | MN687398 |
| A/swine/Indiana/18TOSU3974/2018 | MN687419 | MN687421 | MN687423 | MN687420 | MN687426 | MN687425 | MN687424 | MN687422 |
| A/swine/Indiana/18TOSU3980/2018 | MN686710 | MN686707 | MN686705 | MN686709 | MN686704 | MN686706 | MN686703 | MN686708 |
| A/swine/Indiana/18TOSU4038/2018 | MN686756 | MN686757 | MN686752 | MN686751 | MN686753 |          | MN686755 | MN686754 |
| A/swine/Indiana/18TOSU4071/2018 | MN686465 | MN686469 | MN686470 | MN686466 | MN686468 | MN686471 | MN686472 | MN686467 |
| A/swine/Indiana/18TOSU4073/2018 | MN686718 | MN686713 | MN686714 | MN686712 | MN686715 | MN686711 | MN686717 | MN686716 |
| A/swine/Indiana/18TOSU4122/2018 | MN687335 | MN687342 | MN687339 | MN687337 | MN687336 | MN687338 | MN687341 | MN687340 |
| A/swine/Indiana/18TOSU4133/2018 | MN687408 | MN687409 | MN687404 | MN687407 | MN687402 | MN687406 | MN687405 | MN687403 |
| A/swine/Indiana/18TOSU4229/2018 | MN686512 | MN686510 | MN686511 | MN686517 | MN686513 | MN686516 | MN686515 | MN686514 |
| A/swine/Indiana/18TOSU4326/2018 | MN686633 | MN686634 | MN686637 | MN686635 | MN686631 | MN686632 | MN686630 | MN686636 |
| A/swine/Indiana/18TOSU4338/2018 | MN686743 | MN686749 | MN686744 | MN686747 | MN686745 | MN686750 | MN686746 | MN686748 |
| A/swine/Indiana/18TOSU4348/2018 | MN686601 | MN686596 | MN686594 | MN686598 | MN686600 | MN686597 | MN686595 | MN686599 |
| A/swine/Indiana/18TOSU4353/2018 | MN686479 | MN686475 | MN686473 | MN686477 | MN686478 | MN686480 | MN686474 | MN686476 |
| A/swine/Indiana/18TOSU4461/2018 | MN687432 | MN687433 | MN687430 | MN687428 | MN687434 | MN687427 | MN687429 | MN687431 |
| A/swine/Indiana/18TOSU4471/2018 | MN686401 | MN686399 | MN686397 | MN686400 | MN686396 | MN686395 | MN686402 | MN686398 |
| A/swine/Iowa/18TOSU0351/2018    | MK705268 | MK705266 | MK705264 | MK705269 | MK705270 | MK705263 | MK705265 | MK705267 |
|                                 | MK793286 | MK793284 | MK793282 | MK793287 | MK793288 | MK793281 | MK793283 | MK793285 |
| A/swine/Iowa/18TOSU0355/2018    | MK793294 | MK793292 | MK793290 | MK793295 | MK793296 | MK793289 | MK793291 | MK793293 |
| A/swine/Iowa/18TOSU0358/2018    | MK705259 |          | MK705260 | MK705258 | MK705262 | MK705257 | MK705261 | MK705256 |
| A/swine/Iowa/18TOSU0365/2018    | MK705276 | MK705274 | MK705272 | MK705277 | MK705278 | MK705271 | MK705273 | MK705275 |
|                                 | MK793302 | MK793300 | MK793298 | MK793303 | MK793304 | MK793297 | MK793299 | MK793301 |
| A/swine/Iowa/18TOSU0366/2018    | MK705284 | MK705282 | MK705280 | MK705285 | MK705286 | MK705279 | MK705281 | MK705283 |
|                                 | MK793310 | MK793308 | MK793306 | MK793311 | MK793312 | MK793305 | MK793307 | MK793309 |
| A/swine/Iowa/18TOSU0367/2018    | MK705292 | MK705290 | MK705288 | MK705293 | MK705294 | MK705287 | MK705289 | MK705291 |
|                                 | MK793318 | MK793316 | MK793314 | MK793319 | MK793320 | MK793313 | MK793315 | MK793317 |
| A/swine/Iowa/18TOSU0368/2018    | MK793326 | MK793324 | MK793322 | MK793327 | MK793328 | MK793321 | MK793323 | MK793325 |

|                              |          |          |          |          |          |          |          |          |
|------------------------------|----------|----------|----------|----------|----------|----------|----------|----------|
| A/swine/lowa/18TOSU0369/2018 | MK705300 | MK705298 | MK705296 | MK705301 | MK705302 | MK705295 | MK705297 | MK705299 |
|                              | MK793334 | MK793332 | MK793330 | MK793335 | MK793336 | MK793329 | MK793331 | MK793333 |
| A/swine/lowa/18TOSU0370/2018 | MK705308 | MK705306 | MK705304 | MK705309 | MK705310 | MK705303 | MK705305 | MK793274 |
|                              | MK793277 |          | MK793278 | MK793276 | MK793280 | MK793275 | MK793279 | MK705307 |
| A/swine/lowa/18TOSU0371/2018 | MK705316 | MK705314 | MK705312 | MK705317 | MK705318 | MK705311 | MK705313 | MK705315 |
|                              | MK793342 | MK793340 | MK793338 | MK793343 | MK793344 | MK793337 | MK793339 | MK793341 |
| A/swine/lowa/18TOSU0372/2018 | MK705324 | MK705322 | MK705320 | MK705325 | MK705326 | MK705319 | MK705321 | MK705323 |
|                              | MK793350 | MK793348 | MK793346 | MK793351 | MK793352 | MK793345 | MK793347 | MK793349 |
| A/swine/lowa/18TOSU0373/2018 | MK705328 | MK705334 | MK705332 | MK705329 | MK705330 | MK705331 | MK705333 | MK705327 |
|                              | MK705336 | MK705342 | MK705340 | MK705337 | MK705338 | MK705339 | MK705341 | MK705335 |
|                              | MK793355 | MK793358 | MK793356 | MK793354 | MK793359 | MK793353 | MK793357 | MK793360 |
| A/swine/lowa/18TOSU0374/2018 | MK705348 | MK705346 | MK705344 | MK705349 | MK705350 | MK705343 | MK705345 | MK705347 |
|                              | MK793366 | MK793364 | MK793362 | MK793367 | MK793368 | MK793361 | MK793363 | MK793365 |
| A/swine/lowa/18TOSU0383/2018 | MK705356 | MK705354 | MK705352 | MK705357 | MK705358 | MK705351 | MK705353 | MK705355 |
| A/swine/lowa/18TOSU0387/2018 | MK705364 | MK705362 | MK705360 | MK705365 | MK705366 | MK705359 | MK705361 | MK705363 |
| A/swine/lowa/18TOSU0389/2018 | MK705372 | MK705370 | MK705368 | MK705373 | MK705374 | MK705367 | MK705369 | MK705371 |
| A/swine/lowa/18TOSU0394/2018 | MK705380 | MK705378 | MK705376 | MK705381 | MK705382 | MK705375 | MK705377 | MK705379 |
|                              | MK705388 | MK705386 | MK705384 | MK705389 | MK705390 | MK705383 | MK705385 | MK705387 |
| A/swine/lowa/18TOSU0429/2018 | MK705396 | MK705394 | MK705392 | MK705397 | MK705398 | MK705391 | MK705393 | MK705395 |
| A/swine/lowa/18TOSU0484/2018 | MK705404 | MK705402 | MK705400 | MK705405 | MK705406 | MK705399 | MK705401 | MK705403 |
| A/swine/lowa/18TOSU0488/2018 | MK705412 | MK705410 | MK705408 | MK705413 | MK705414 | MK705407 | MK705409 | MK705411 |
| A/swine/lowa/18TOSU0490/2018 | MK705420 | MK705418 | MK705416 | MK705421 | MK705422 | MK705415 | MK705417 | MK705419 |
| A/swine/lowa/18TOSU0491/2018 | MK705428 | MK705426 | MK705424 | MK705429 | MK705430 | MK705423 | MK705425 | MK705427 |
| A/swine/lowa/18TOSU0493/2018 | MK705436 | MK705434 | MK705432 | MK705437 | MK705438 | MK705431 | MK705433 | MK705435 |
| A/swine/lowa/18TOSU0494/2018 | MK705444 | MK705442 | MK705440 | MK705445 | MK705446 | MK705439 | MK705441 | MK705443 |
| A/swine/lowa/18TOSU0502/2018 | MK705452 | MK705450 | MK705448 | MK705453 | MK705454 | MK705447 | MK705449 | MK705451 |
| A/swine/lowa/18TOSU0505/2018 | MK705460 | MK705458 | MK705464 | MK705469 | MK705462 | MK705463 | MK705465 | MK705459 |
|                              | MK705468 | MK705466 | MK705456 | MK705461 | MK705470 | MK705455 | MK705457 | MK705467 |
| A/swine/lowa/18TOSU0509/2018 | MK705476 | MK705474 | MK705472 | MK705477 | MK705478 | MK705471 | MK705473 | MK705475 |
| A/swine/lowa/18TOSU0525/2018 | MK705484 | MK705482 | MK705480 | MK705485 | MK705486 | MK705479 | MK705481 | MK705483 |
| A/swine/lowa/18TOSU0527/2018 | MK705492 | MK705490 | MK705488 | MK705493 | MK705494 | MK705487 | MK705489 | MK705491 |
| A/swine/lowa/18TOSU0528/2018 | MK705500 | MK705498 | MK705496 | MK705501 | MK705502 | MK705495 | MK705497 | MK705499 |
| A/swine/lowa/18TOSU0540/2018 | MK705508 | MK705506 | MK705504 | MK705509 | MK705510 | MK705503 | MK705505 | MK705507 |
| A/swine/lowa/18TOSU0571/2018 | MK705516 | MK705514 | MK705512 | MK705517 | MK705518 | MK705511 | MK705513 | MK705515 |
|                              | MK705524 | MK705522 | MK705520 | MK705525 | MK705526 | MK705519 | MK705521 | MK705523 |
| A/swine/lowa/18TOSU0575/2018 | MK705532 | MK705530 | MK705528 | MK705533 | MK705534 | MK705527 | MK705529 | MK705531 |
| A/swine/lowa/18TOSU0585/2018 | MK705540 | MK705538 | MK705536 | MK705541 | MK705542 | MK705535 | MK705537 | MK705539 |
| A/swine/lowa/18TOSU0599/2018 | MK705548 | MK705546 | MK705544 | MK705549 | MK705550 | MK705543 | MK705545 | MK705547 |
| A/swine/lowa/18TOSU0602/2018 | MK705556 | MK705554 | MK705552 | MK705557 | MK705558 | MK705551 | MK705553 | MK705555 |
|                              | MK705564 | MK705562 | MK705560 | MK705565 | MK705566 | MK705559 | MK705561 | MK705563 |
| A/swine/lowa/18TOSU0603/2018 | MK705568 | MK705572 | MK705570 | MK705575 | MK705576 | MK705569 | MK705571 | MK705567 |
|                              | MK705574 | MK705582 | MK705578 | MK705580 | MK705581 | MK705577 | MK705579 | MK705573 |
| A/swine/lowa/18TOSU0604/2018 | MK705588 | MK705586 | MK705584 | MK705589 | MK705590 | MK705583 | MK705585 | MK705587 |
| A/swine/lowa/18TOSU0605/2018 | MK705596 | MK705594 | MK705592 | MK705597 | MK705598 | MK705591 | MK705593 | MK705595 |
| A/swine/lowa/18TOSU0608/2018 | MK705604 | MK705602 | MK705600 | MK705605 | MK705606 | MK705599 | MK705601 | MK705603 |
| A/swine/lowa/18TOSU0609/2018 | MK705612 | MK705610 | MK705608 | MK705613 | MK705614 | MK705607 | MK705609 | MK705611 |
| A/swine/lowa/18TOSU0614/2018 | MK705620 | MK705618 | MK705616 | MK705621 | MK705622 | MK705615 | MK705617 | MK705619 |



|                                  |          |          |          |          |          |          |          |          |
|----------------------------------|----------|----------|----------|----------|----------|----------|----------|----------|
| A/swine/lowa/18TOSU0625/2018     | MK705628 | MK705626 | MK705624 | MK705629 | MK705630 | MK705623 | MK705625 | MK705627 |
| A/swine/lowa/18TOSU0626/2018     | MK705636 | MK705634 | MK705632 | MK705637 | MK705638 | MK705631 | MK705633 | MK705635 |
| A/swine/lowa/18TOSU0636/2018     | MK705644 | MK705642 | MK705640 | MK705645 | MK705646 | MK705639 | MK705641 | MK705643 |
| A/swine/lowa/18TOSU0641/2018     | MK705660 | MK705658 | MK705648 | MK705661 | MK705662 | MK705647 | MK705651 | MK705659 |
|                                  | MK705654 | MK705652 | MK705650 | MK705655 | MK705656 | MK705649 | MK705657 | MK705653 |
| A/swine/lowa/18TOSU0642/2018     | MK705668 | MK705666 | MK705664 | MK705669 | MK705670 | MK705663 | MK705665 | MK705667 |
| A/swine/lowa/18TOSU0644/2018     | MK705676 | MK705674 | MK705672 | MK705677 | MK705678 | MK705671 | MK705673 | MK705675 |
| A/swine/lowa/18TOSU0645/2018     | MK705684 | MK705682 | MK705680 | MK705685 | MK705686 | MK705679 | MK705681 | MK705683 |
| A/swine/lowa/18TOSU0649/2018     | MK705692 | MK705690 | MK705688 | MK705693 | MK705694 | MK705687 | MK705689 | MK705691 |
| A/swine/lowa/18TOSU0739/2018     | MK705252 |          | MK705253 | MK705251 | MK705255 | MK705250 | MK705254 | MK705249 |
| A/swine/lowa/18TOSU0750/2018     | MK705700 | MK705698 | MK705696 | MK705701 | MK705702 | MK705695 | MK705697 | MK705699 |
| A/swine/lowa/18TOSU0751/2018     | MK705708 | MK705706 | MK705704 | MK705709 | MK705710 | MK705703 | MK705705 | MK705707 |
|                                  | MK705714 |          | MK705715 | MK705713 | MK705717 | MK705712 | MK705716 | MK705711 |
| A/swine/lowa/18TOSU0767/2018     | MK705723 | MK705721 | MK705719 | MK705724 | MK705725 | MK705718 | MK705720 | MK705722 |
| A/swine/lowa/18TOSU0771/2018     | MK705731 | MK705729 | MK705727 | MK705732 | MK705733 | MK705726 | MK705728 | MK705730 |
| A/swine/lowa/18TOSU0774/2018     | MK705739 | MK705737 | MK705735 | MK705740 | MK705741 | MK705734 | MK705736 | MK705738 |
| A/swine/lowa/18TOSU0775/2018     | MK705747 | MK705745 | MK705743 | MK705748 | MK705749 | MK705742 | MK705744 | MK705746 |
| A/swine/lowa/18TOSU2663/2018     | MN198917 | MN198916 | MN198915 | MN198910 | MN198913 | MN198912 | MN198911 | MN198914 |
| A/swine/lowa/18TOSU2664/2018     | MN686497 | MN686496 | MN686494 | MN686491 | MN686495 | MN686490 | MN686492 | MN686493 |
| A/swine/Kentucky/18TOSU1487/2018 | MN198613 | MN198612 | MN198611 | MN198606 | MN198609 | MN198608 | MN198607 | MN198610 |
| A/swine/Kentucky/18TOSU1508/2018 | MN198341 | MN198340 | MN198339 | MN198334 | MN198337 | MN198336 | MN198335 | MN198338 |
| A/swine/Kentucky/18TOSU1512/2018 | MN198812 | MN198811 | MN198810 | MN198805 | MN198808 | MN198807 | MN198806 | MN198809 |
| A/swine/Kentucky/18TOSU1535/2018 | MN198828 | MN198827 | MN198826 | MN198821 | MN198824 | MN198823 | MN198822 | MN198825 |
| A/swine/Kentucky/18TOSU1555/2018 | MN198303 | MN198302 | MN198301 | MN198296 | MN198299 | MN198298 | MN198297 | MN198300 |
| A/swine/Kentucky/18TOSU1596/2018 | MN198365 | MN198364 | MN198363 | MN198358 | MN198361 | MN198360 | MN198359 | MN198362 |
| A/swine/Kentucky/18TOSU1612/2018 | MN198820 | MN198819 | MN198818 | MN198813 | MN198816 | MN198815 | MN198814 | MN198817 |
| A/swine/Kentucky/18TOSU1636/2018 | MN198804 | MN198803 | MN198802 | MN198797 | MN198800 | MN198799 | MN198798 | MN198801 |
| A/swine/Kentucky/18TOSU1638/2018 | MN198525 | MN198524 | MN198523 | MN198518 | MN198521 | MN198520 | MN198519 | MN198522 |
| A/swine/Kentucky/18TOSU1648/2018 | MN198255 | MN198254 | MN198253 | MN198248 | MN198251 | MN198250 | MN198249 | MN198252 |
| A/swine/Kentucky/18TOSU1939/2018 | MN198421 | MN198420 | MN198419 | MN198414 | MN198417 | MN198416 | MN198415 | MN198418 |
| A/swine/Kentucky/18TOSU1953/2018 | MN198199 | MN198198 | MN198197 | MN198192 | MN198195 | MN198194 | MN198193 | MN198196 |
| A/swine/Kentucky/18TOSU1961/2018 | MN198732 | MN198731 | MN198730 | MN198725 | MN198728 | MN198727 | MN198726 | MN198729 |
| A/swine/Kentucky/18TOSU2014/2018 | MN198796 | MN198795 | MN198794 | MN198789 | MN198792 | MN198791 | MN198790 | MN198793 |
| A/swine/Kentucky/18TOSU2043/2018 | MN198676 | MN198675 | MN198674 | MN198669 | MN198672 | MN198671 | MN198670 | MN198673 |
| A/swine/Kentucky/18TOSU3005/2018 | MN687436 | MN687442 | MN687443 | MN687441 | MN687440 | MN687439 | MN687437 | MN687438 |
| A/swine/Kentucky/18TOSU3008/2018 | MN686246 |          | MN686252 | MN686247 | MN686251 | MN686250 | MN686249 | MN686248 |
| A/swine/Michigan/18TOSU4181/2018 | MN686487 | MN686482 | MN686484 | MN686488 | MN686485 | MN686486 | MN686489 | MN686483 |
| A/swine/Michigan/18TOSU4199/2018 | MN687451 | MN687449 | MN687448 | MN687444 | MN687445 | MN687446 | MN687450 | MN687447 |
| A/swine/Michigan/18TOSU4584/2018 | MN686332 | MN686326 | MN686331 | MN686328 | MN686325 | MN686329 | MN686327 | MN686330 |
| A/swine/Michigan/18TOSU4588/2018 | MN686378 |          | MN686372 | MN686377 | MN686374 | MN686376 | MN686373 | MN686375 |
| A/swine/Michigan/18TOSU4593/2018 | MN686456 | MN686454 | MN686453 | MN686455 | MN686451 | MN686452 | MN686450 | MN686449 |
| A/swine/Michigan/18TOSU4887/2018 | MN687322 |          | MN687317 | MN687320 | MN687318 |          | MN687319 | MN687321 |
| A/swine/Michigan/18TOSU4897/2018 | MN686232 | MN686230 | MN686231 | MN686233 | MN686229 | MN686226 | MN686228 | MN686227 |
| A/swine/Ohio/18TOSU0243/2018     | MN198668 | MN198667 | MN198666 | MN198661 | MN198664 | MN198663 | MN198662 | MN198665 |

|                              |          |          |                      |                      |          |          |          |          |
|------------------------------|----------|----------|----------------------|----------------------|----------|----------|----------|----------|
| A/swine/Ohio/18TOSU0251/2018 | MN198861 | MN198860 | MN198859             | MN198854             | MN198857 | MN198856 | MN198855 | MN198858 |
| A/swine/Ohio/18TOSU0265/2018 | MN198684 | MN198683 | MN198682             | MN198677             | MN198680 | MN198679 | MN198678 | MN198681 |
| A/swine/Ohio/18TOSU0282/2018 | MN198637 | MN198636 | MN198635             | MN198630             | MN198633 | MN198632 | MN198631 | MN198634 |
| A/swine/Ohio/18TOSU0288/2018 | MN198381 | MN198380 | MN198379             | MN198374             | MN198377 | MN198376 | MN198375 | MN198378 |
| A/swine/Ohio/18TOSU0289/2018 | MN198557 | MN198556 | MN198555             | MN198550             | MN198553 | MN198552 | MN198551 | MN198554 |
| A/swine/Ohio/18TOSU0296/2018 | MN198740 | MN198739 | MN198738             | MN198733             | MN198736 | MN198735 | MN198734 | MN198737 |
| A/swine/Ohio/18TOSU0303/2018 | MN198429 | MN198428 | MN198427             | MN198422             | MN198425 | MN198424 | MN198423 | MN198426 |
| A/swine/Ohio/18TOSU0306/2018 | MN198287 | MN198286 | MN198285             | MN198280             | MN198283 | MN198282 | MN198281 | MN198284 |
| A/swine/Ohio/18TOSU0313/2018 | MN198485 | MN198484 | MN198483             | MN198478             | MN198481 | MN198480 | MN198479 | MN198482 |
| A/swine/Ohio/18TOSU0330/2018 | MN198349 | MN198348 | MN198347             | MN198342             | MN198345 | MN198344 | MN198343 | MN198346 |
| A/swine/Ohio/18TOSU0332/2018 | MN198279 | MN198278 | MN198277             | MN198272             | MN198275 | MN198274 | MN198273 | MN198276 |
| A/swine/Ohio/18TOSU0333/2018 | MN198501 | MN198500 | MN198499             | MN198494             | MN198497 | MN198496 | MN198495 | MN198498 |
| A/swine/Ohio/18TOSU0342/2018 | MN198845 | MN198844 | MN198842<br>MN198843 | MN198837<br>MN198838 |          | MN198840 | MN198839 | MN198841 |
| A/swine/Ohio/18TOSU0344/2018 | MN198565 | MN198564 | MN198563             | MN198558             | MN198561 | MN198560 | MN198559 | MN198562 |
| A/swine/Ohio/18TOSU0786/2018 | MN198357 | MN198356 | MN198355             | MN198350             | MN198353 | MN198352 | MN198351 | MN198354 |
| A/swine/Ohio/18TOSU0814/2018 | MN198509 | MN198508 | MN198507             | MN198502             | MN198505 | MN198504 | MN198503 | MN198506 |
| A/swine/Ohio/18TOSU0817/2018 | MN198748 | MN198747 | MN198746             | MN198741             | MN198744 | MN198743 | MN198742 | MN198745 |
| A/swine/Ohio/18TOSU0822/2018 | MN198581 | MN198580 | MN198579             | MN198574             | MN198577 | MN198576 | MN198575 | MN198578 |
| A/swine/Ohio/18TOSU0852/2018 | MN198836 | MN198835 | MN198834             | MN198829             | MN198832 | MN198831 | MN198830 | MN198833 |
| A/swine/Ohio/18TOSU0888/2018 | MN198517 | MN198516 | MN198515             | MN198510             | MN198513 | MN198512 | MN198511 | MN198514 |
| A/swine/Ohio/18TOSU0937/2018 | MN198597 | MN198596 | MN198595             | MN198590             | MN198593 | MN198592 | MN198591 | MN198594 |
| A/swine/Ohio/18TOSU0944/2018 | MN198231 | MN198230 | MN198229             | MN198224             | MN198227 | MN198226 | MN198225 | MN198228 |
| A/swine/Ohio/18TOSU0973/2018 | MN198469 | MN198468 | MN198467             | MN198462             | MN198465 | MN198464 | MN198463 | MN198466 |
| A/swine/Ohio/18TOSU0974/2018 | MN198207 | MN198206 | MN198205             | MN198200             | MN198203 | MN198202 | MN198201 | MN198204 |
| A/swine/Ohio/18TOSU0980/2018 | MN198389 | MN198388 | MN198387             | MN198382             | MN198385 | MN198384 | MN198383 | MN198386 |
| A/swine/Ohio/18TOSU0982/2018 | MN198573 | MN198572 | MN198571             | MN198566             | MN198569 | MN198568 | MN198567 | MN198570 |
| A/swine/Ohio/18TOSU1022/2018 | MN198413 | MN198412 | MN198411             | MN198406             | MN198409 | MN198408 | MN198407 | MN198410 |
| A/swine/Ohio/18TOSU1050/2018 | MN198541 | MN198540 | MN198539             | MN198534             | MN198537 | MN198536 | MN198535 | MN198538 |
| A/swine/Ohio/18TOSU1064/2018 | MN198764 | MN198763 | MN198762             | MN198757             | MN198760 | MN198759 | MN198758 | MN198761 |
| A/swine/Ohio/18TOSU1093/2018 | MN198247 | MN198246 | MN198245             | MN198240             | MN198243 | MN198242 | MN198241 | MN198244 |
| A/swine/Ohio/18TOSU1164/2018 | MN198653 | MN198652 | MN198651             | MN198646             | MN198649 | MN198648 | MN198647 | MN198650 |
| A/swine/Ohio/18TOSU1193/2018 | MN198437 | MN198436 | MN198435             | MN198430             | MN198433 | MN198432 | MN198431 | MN198434 |
| A/swine/Ohio/18TOSU1194/2018 | MN198223 | MN198222 | MN198221             | MN198216             | MN198219 | MN198218 | MN198217 | MN198220 |
| A/swine/Ohio/18TOSU1198/2018 | MN198756 | MN198755 | MN198754             | MN198749             | MN198752 | MN198751 | MN198750 | MN198753 |
| A/swine/Ohio/18TOSU1210/2018 | MN198295 | MN198294 | MN198293             | MN198288             | MN198291 | MN198290 | MN198289 | MN198292 |
| A/swine/Ohio/18TOSU2072/2018 | MN198925 | MN198924 | MN198923             | MN198918             | MN198921 | MN198920 | MN198919 | MN198922 |
| A/swine/Ohio/18TOSU2454/2018 | MN198933 | MN198932 | MN198931             | MN198926             | MN198929 | MN198928 | MN198927 | MN198930 |
| A/swine/Ohio/18TOSU2498/2018 | MN686440 | MN686441 | MN686443             | MN686438             | MN686442 | MN686439 | MN686445 | MN686444 |
| A/swine/Ohio/18TOSU3783/2018 | MN687456 |          | MN687453             | MN687455             | MN687452 |          | MN687457 | MN687454 |
| A/swine/Ohio/18TOSU3790/2018 | MN687364 | MN687357 | MN687358             | MN687361             | MN687360 | MN687359 | MN687362 | MN687363 |
| A/swine/Ohio/18TOSU3842/2018 | MN687343 |          | MN687347             | MN687346             | MN687345 |          | MN687344 | MN687348 |
| A/swine/Ohio/18TOSU3860/2018 | MN686642 | MN686644 | MN686641             | MN686646             | MN686645 | MN686647 | MN686640 | MN686643 |
| A/swine/Ohio/18TOSU4084/2018 | MN686416 | MN686415 | MN686414             | MN686412             | MN686418 | MN686417 | MN686411 | MN686413 |



|                              |          |          |          |          |          |          |          |          |
|------------------------------|----------|----------|----------|----------|----------|----------|----------|----------|
| A/swine/Ohio/18TOSU4098/2018 | MN686406 | MN686408 | MN686409 | MN686405 | MN686410 | MN686404 | MN686403 | MN686407 |
| A/swine/Ohio/18TOSU4422/2018 | MN687351 | MN687350 | MN687349 | MN687356 | MN687354 | MN687352 | MN687353 | MN687355 |
| A/swine/Ohio/18TOSU4439/2018 | MN686726 | MN686722 | MN686724 | MN686721 | MN686723 | MN686720 | MN686725 | MN686719 |
| A/swine/Ohio/18TOSU4522/2018 | MH922886 | MH922881 | MH922884 | MH922878 | MH922883 | MH922888 | MH922892 | MH922889 |
| A/swine/Ohio/18TOSU4536/2018 | MH922890 | MH922885 | MH922887 | MH922879 | MH922891 | MH922877 | MH922882 | MH922880 |
| A/swine/Ohio/18TOSU4562/2018 | MN686388 | MN686387 | MN686394 | MN686392 | MN686389 | MN686391 | MN686393 | MN686390 |
| A/swine/Ohio/18TOSU4576/2018 | MN686426 | MN686420 | MN686422 | MN686419 | MN686421 | MN686423 | MN686425 | MN686424 |
| A/swine/Ohio/18TOSU4681/2018 | MN686361 | MN686356 | MN686362 | MN686358 | MN686360 | MN686355 | MN686357 | MN686359 |
| A/swine/Ohio/18TOSU4684/2018 | MN686502 | MN686509 | MN686506 | MN686503 | MN686504 | MN686505 | MN686507 | MN686508 |
| A/swine/Ohio/18TOSU5106/2018 | MN686522 |          | MN686523 | MN686519 | MN686518 |          | MN686520 | MN686521 |
| A/swine/Ohio/18TOSU5117/2018 | MN686266 |          | MN686269 | MN686271 | MN686270 |          | MN686267 | MN686268 |
